# Supplementary material for: Grifolin directly targets ERK1/2 to epigenetically suppress cancer cell metastasis
Source: PubMed Central journal article supplement (PMC4767464; doi:10.18632/oncotarget.5678), 2015-10-26
Supplement: oncotarget-06-42704-s001.pdf [file oncotarget-06-42704-s001.pdf]

## SUPPLEMENTARY FIGURES

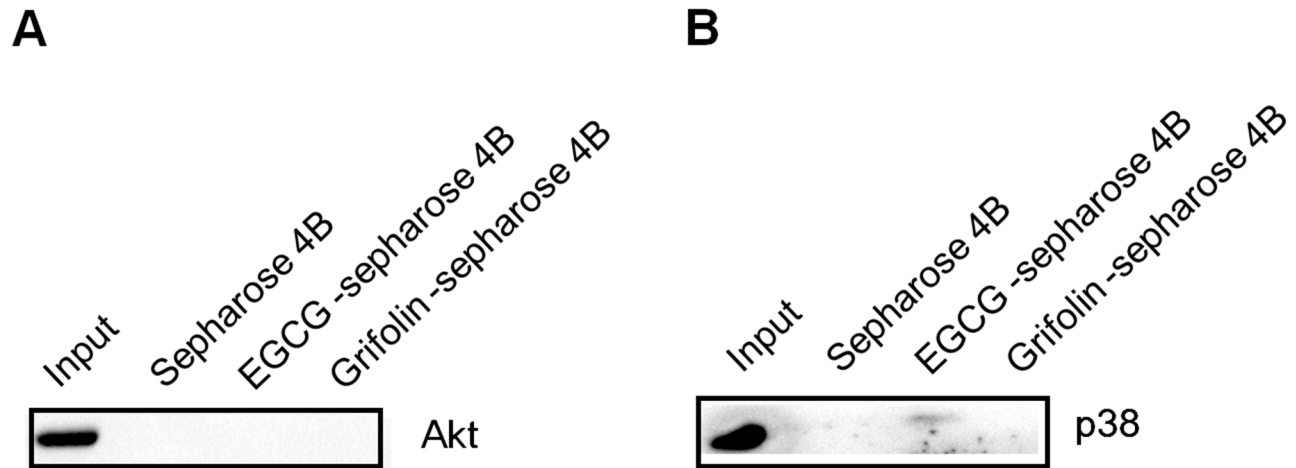

**Supplementary Figure S1: The target specificity of grifolin-binding proteins. Immunoblot analysis of whole cell lysate following purification by a Sepharose 4B, grifolin-Sepharose 4B or EGCG-Sepharose affinity column. A. The Akt/grifolin complex or B. p38/grifolin complex was detected by Western blot using an antibody against Akt and p38, respectively.**

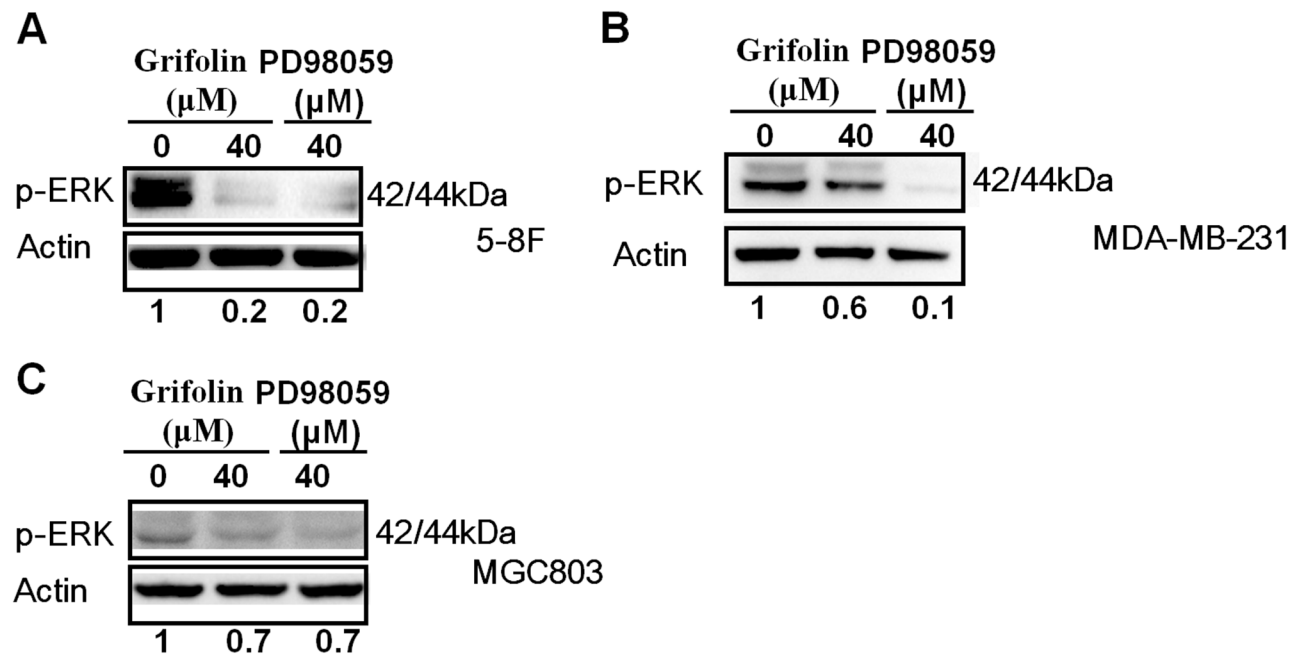

**Supplementary Figure S2: Grifolin decreases phosphor-ERK in high-metastatic cancer cells. A. 5-8F, B. MDA-MB-231 or C. MGC803 cells were treated as designated for 12 h. Cell lysates were prepared and examined by Western blot with an antibody against phosphor-ERK.**

**A**

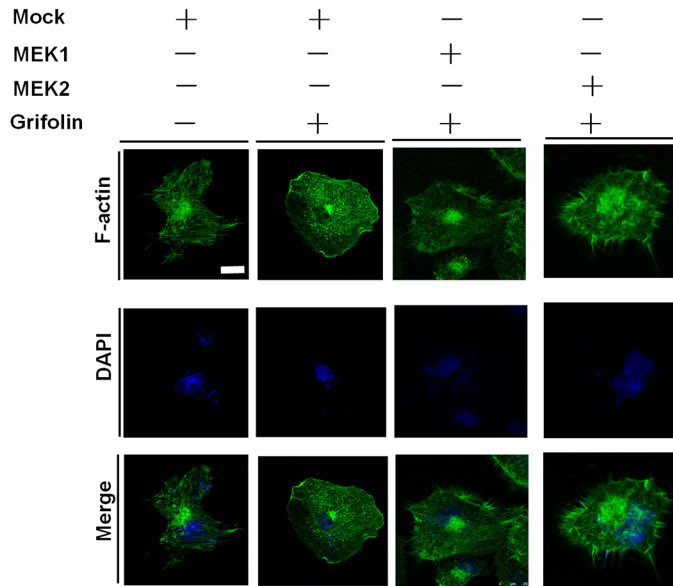

5-8F

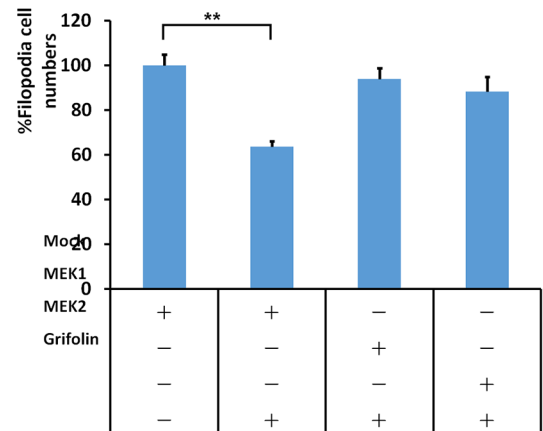

**B**

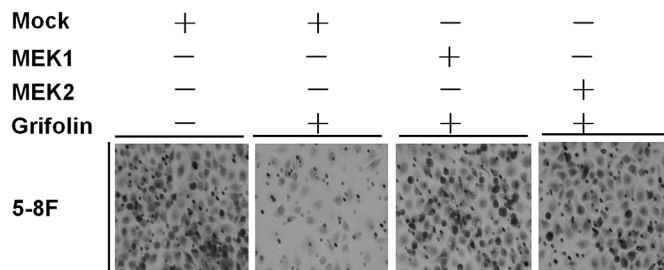

5-8F

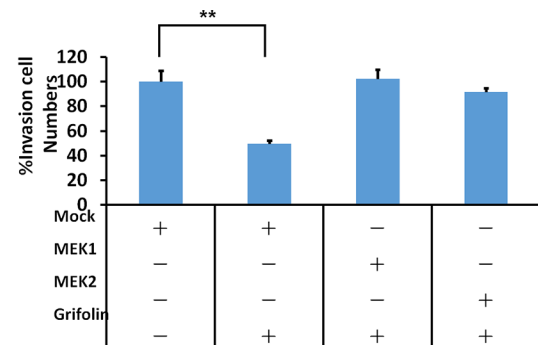

**Supplementary Figure S3: Overexpression of constitutively active MEK1/2 rescue filopodia formation and invasion capacity of 5-8F cells suppressed by grifolin treatment.** 5-8F cells were transfected with constructs as indicated, followed by grifolin or DMSO (control) treatment for additional 24 h, then cells were applied to (A) immunofluorescence analysis or (B) invasion assay. **A.** Cells were stained with fluorescein isothiocyanate/phalloidin and visualized using Leica TCS SP5 confocal microscopy. Images are representative of at least 3 independent experiments. Scale bar, 25  $\mu$ m. **B.** Counts were obtained (in triplicate fields of view) from the Mock control (average set at 100% invasion) and were used to calculate percent invasion for all other treatments. Data are shown as mean values  $\pm$  S.D. of independent, triplicate experiments. The asterisks (\*\*) indicate a significant difference ( $P < 0.01$ ) compared to the Mock control.

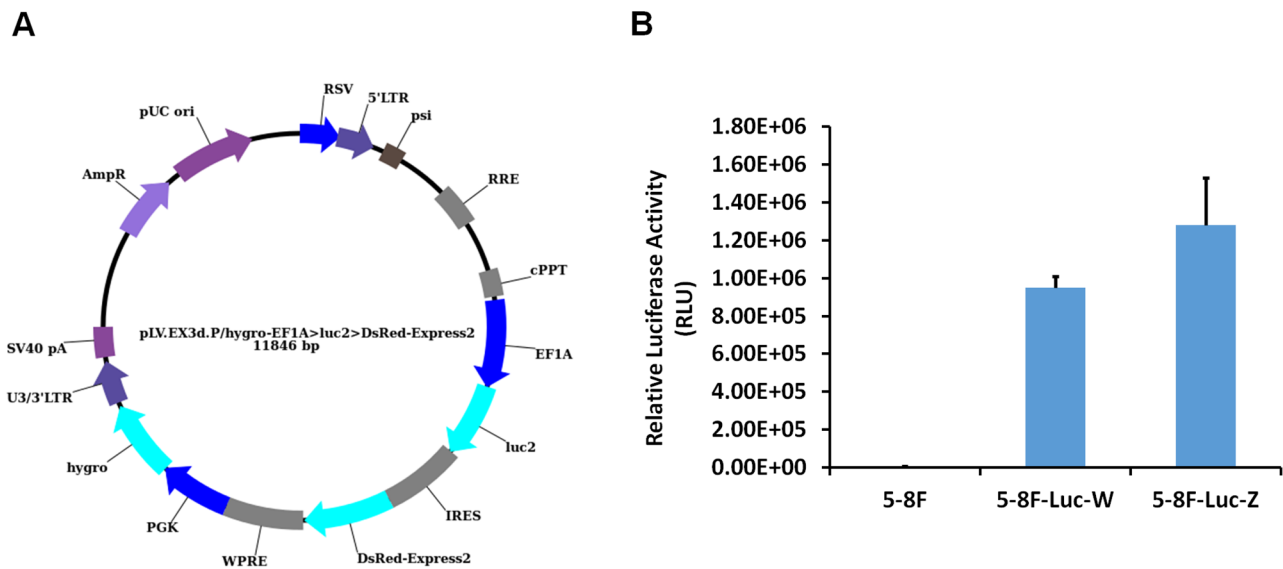

**Supplementary Figure S4: Establishment of nasopharyngeal carcinoma cell 5–8F-Z stable expression of luciferase.** **A.** The firefly luciferase (*luc*) gene was inserted into vector pLV.Des3d.P/Hygro by Gateway Recombination Cloning Technology. The construct (pLV.EX3d.P/Hygro-EF1A > luciferase (*luc2*) > IRES/ DsRed-Express2) was transfected into 5–8F cells to establish two cloned cell line 5–8F-luc-W and 5–8F-luc-Z, which stable expressed luciferase. **B.** The luciferase assay was used to evaluate the luciferase activity of 5–8F-luc-W and 5–8F-luc-Z, respectively.

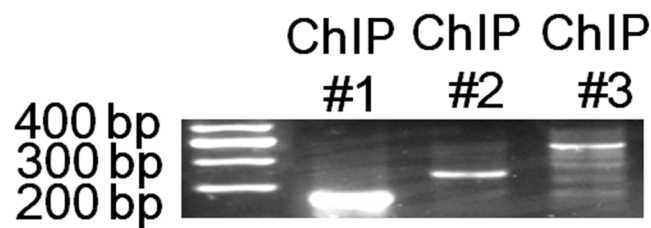

**Supplementary Figure S5: Evaluation efficiency of different ChIP primers for Elk1 binding to the *dnmt1* promoter.** Three pairs of ChIP primers for each potential binding site in the *dnmt1* promoter region were examined for the ability to be enriched by Elk1 immunoprecipitation. ChIP primers were as follows: ChIP 1#, sense 5'-ATCATGG CTCATTGCAGCCTAC-3'; antisense 5'-TCAAGACCAGCCTGAGCAACAT-3'; ChIP 2#, 5'-GCCATG TTG CTC AGGCTGGT -3'; antisense 5'-AACTAAG GATAGCTATACAGC-3'; ChIP 3#, 5'-GCCATGTTGCTCAGGCTGGT-3'; antisense 5'-AACTATAGTGCTCCTAGAAG-3'. The cross-linked chromatin of 5–8F cell was precipitated with Elk1 antibody. Precipitated DNA was analyzed by PCR using primers that amplified a 158-bp, a 234-bp or a 360-bp sequence corresponding to ChIP 1#, ChIP 2# and ChIP 3#, respectively.

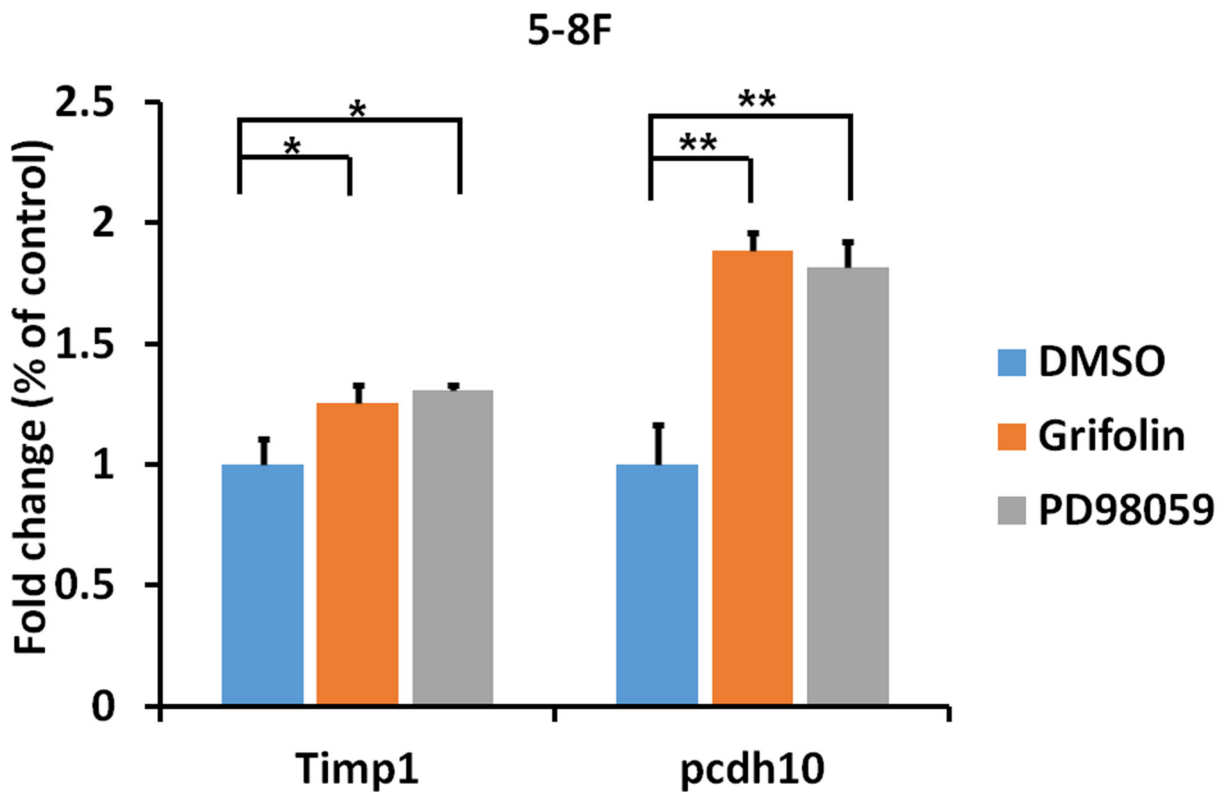

**Supplementary Figure S6: Restored mRNA expression of metastasis suppressor gene Timp1 and pcdh10 induced by grifolin.** 5-8F cells were treated with DMSO, 40  $\mu$ M grifolin or 40  $\mu$ M PD98059 as designated for 24 h. Total RNA was isolated from cells and subjected to real-PCR. PCR primers were as follows: Timp1, sense 5'-CTGCGGATACTTCCACAGGTC-3'; antisense 5'-GCAAGAGTCCATCCTGCAGTT-3'; pcdh10, sense 5'-AGTACGGACACTGAGCACAACC-3'; antisense 5'-CGGCGAGGTCTGTCAACTAGATAG-3'. Data are shown as mean values  $\pm$ S.D. of independent, triplicate experiments. The asterisks (\*\*) indicate a significant difference ( $P < 0.01$ ) compared to the control.
